# Supplementary material
Source: PubMed Central journal article supplement (PMC9685328)
Supplement: NIHMS1813820-supplement-319817_Data_Supplement.pdf [file NIHMS1813820-supplement-319817_Data_Supplement.pdf]

# Supplemental Materials

## Materials and Methods

### Human Myocardial Samples

Myocardial samples were obtained from failing hearts from patients undergoing heart transplantation or mechanical circulatory support device implantation at the Virginia Commonwealth University as part of the Division of Cardiology Tissue Biobank under a long-standing protocol approved by the Internal Review Board (IRB #HM11452). Patients signed written consent for use of their explanted hearts for research purposes. Non-failing donor hearts were defined by no major cardiac history and a left ventricular echocardiography-based fractional shortening  $\geq 25\%$ . Non-failing left ventricular samples were obtained from organ donors whose hearts could not be placed for transplantation due to size, ABO mismatch, or other factors. Family members of organ donors signed written consent for research use of explanted cardiac tissue obtained by the local organ procurement agency. Immediately after explantation, left ventricular free wall that are remote from infarcted segments were immersed in liquid nitrogen, transported to the laboratory, and stored at -80 degree Celsius.

### Experimental Animals

3-MST KO mice were generated by breeding 3-MST<sup>flox+/flox+</sup> mice to global Cre expressing mice as previously described<sup>1</sup>. Due to the well-established cardiovascular protective effects of estrogen seen in young-adult female mice<sup>2</sup>, only male 3-MST KO and age matched C57BL/6J (Jackson Laboratories, Bar Harbor, Maine) wild-type control (9 to 11 weeks of age) were used in the studies described in the current manuscript. Studies using ovariectomized or postmenopausal female mice will be performed in the future to fully investigate the effects of 3-MST in cardiovascular system for both sexes. Minimal group sizes of n=7 to 10 for physiological experiments were determined using a power and sample analysis with the significance level at 5% and power at 80%. All experimental protocols were approved by the Institute for Animal Care and Use Committee at LSU Health Sciences Center-New Orleans and conformed to the Guide for the Care and Use of Laboratory Animals. All experimental animals received

humane care in accordance with National Society of Medical Research and National Institutes of Health tenets.

In experiments involving treatments, animals were randomized through Research Randomizer (randomizer.org) prior to initiating treatment. No animals were excluded during the study, however; presented data may have different numbers of animals per endpoint due to procedural complications, limited sample collection (i.e., plasma volume), or lack of participation in involuntary treadmill running.

### **BCKD Kinase Inhibitor Treatment**

3,6-dichlorobenzo[*b*]thiophene-2-carboxylic acid (BT2) was purchased from Sigma-Aldrich (Burlington, MA) and administered at the dose of 40 mg/kg/day as previously described<sup>3, 4</sup>.

### **Hydrogen Sulfide Donor Treatment**

JK-1 was synthesized and the optimal dose were determined as previously reported<sup>5, 6</sup>. Mice were administered with either Vehicle or JK-1 at the dose of 200 mg/kg/day as previously described<sup>6</sup>.

### **Transverse Aortic Constriction (TAC) Protocol**

Cardiac hypertrophy and heart failure was induced via transverse aortic constriction (TAC) as previously described<sup>6</sup>. The animals were observed for 12 weeks following TAC surgery. The experimental protocol is described in **Figure 2**.

### **Echocardiography**

Echocardiography was performed at baseline and every 3 weeks during the 12-week protocol using a Vevo-2100 ultrasound system (Visual Sonics, Toronto, Canada) as previously described<sup>6</sup>. During the procedure, the mice were anesthetized with 3 to 4 % and maintained at 0.5 to 1.5% isoflurane during the acquisition of echocardiography images. LV chamber diameters at end diastole (LVEDD) and LV ejection fraction (LVEF) were measured using series of 5 M-mode images across the long-axis view. All images were taken within a heart rate range of 450 to 500 bpm.

### **Left Ventricular (LV) Hemodynamics Assessment**

Invasive hemodynamic measurement was performed at the 12-week endpoint using a 1.2F Transonic high-fidelity pressure catheter with a solid-state sensor mounted at the tip (Transonic, NY, USA). The pressure catheters were fully calibrated using electronic two-point calibration. The mice were anesthetized with 3 to 4% isoflurane and maintained at 1 to 1.5% during the procedure, then the pressure catheter was inserted into the right common carotid and advanced into the LV lumen. LV end-diastolic pressure and relaxation constant Tau were presented.

### **Transmission Electron Microscopy**

The morphology and structure of the myocardial mitochondria harvested from wild-type and 3-MST KO mice at 12 weeks post TAC were evaluated using transmission electron microscopy as previously described<sup>7</sup>.

### **Mitochondria Isolation and Respiration Assays**

Hearts were extracted from mice following cervical dislocation at 12 weeks post TAC and mitochondria were isolated using a commercially available kit (MITOISO1, Sigma-Aldrich, Burlington, MA) following manufacture's instruction. Then the mitochondrial specific H<sub>2</sub>S production were also measured by combined gas chromatography - sulfur chemiluminescence method as described below with addition of 3-mercaptopyruvate as substrate. The respiration capacity of the isolated mitochondria was measured using a Clark-type oxygen electrode (Hansatech Instruments, Amesbury, MA) with the presence of pyruvate or palmitoyl-L-Carnitine, as previously described<sup>8</sup>.

### **ATP Synthesis Efficiency**

Aliquots of respiration reaction buffer were taken from the Clark-type oxygen electrode chamber over a 1-minute period after the addition of ADP. Then ATP concentration in these aliquots were quantified using an ATP determination kit (A-22066; Molecular Probes, Eugene, OR). Then the ATP concentration were normalized to the oxygen consumption rate and ATP synthesis efficiency is presented as ATP/Oxygen ratio.

### **Circulating B-type Natriuretic Peptide (BNP) Quantification**

Circulating BNP levels were measured at 12 weeks post TAC using an enzyme-linked immunoassay. (EK-011-23, Phoenix Pharmaceuticals, Burlingame, CA).

### **H<sub>2</sub>S and Sulfane Sulfur Measurement**

H<sub>2</sub>S and sulfane sulfur levels in the myocardial samples from patients and experimental animals were measured by combined gas chromatography – sulfur chemiluminescence methods (Agilent, Santa Clara, CA) as previously described<sup>9-11</sup>.

### **Vascular Reactivity Studies**

At 12 weeks following TAC, isolated thoracic aorta segments were harvested and vascular reactivity to acetylcholine (ACh) and sodium nitroprusside (SNP) were determined as previously described<sup>6</sup>. Briefly, aortic rings (2-3 mm) were equilibrated in oxygenated Krebs-Henseleit solution at 0.5 g tension for 30 min. Rings were pre-contracted with phenylephrine (1 μM) then challenged with increasing concentrations of acetylcholine (10<sup>-9</sup> to 10<sup>-5</sup> M) to assess endothelial-dependent vasorelaxation, or sodium nitroprusside (10<sup>-10.5</sup> to 10<sup>-7</sup> M) to measure endothelial-independent vasorelaxation. Data are reported as percent of relaxation from maximum contraction to phenylephrine.

### **Western Blot Analysis**

Human heart samples were homogenized, sonicated, and centrifuged at 10,000x g for 15 minutes at 4°C in RIPA buffer; a protease and phosphatase inhibitor cocktail were added accordingly (Halt, ThermoScientific). Total proteins (100μg) from each sample were separated by SDS-PAGE on 10% acrylamide gels, transferred onto a nitrocellulose membrane, and blocked with 5% nonfat dry milk in Tris-buffered saline. Membranes were incubated overnight with antibodies for CSE (1:1000; Santa Cruz Biotechnology SC-100583), MST (1:1000; Santa Cruz Biotechnology sc-86170), CBS (1:1000; Santa Cruz Biotechnology sc-67154) and GAPDH (1:5000 Cell Signaling). Membranes were then incubated with secondary antibodies 1:5000 in 5% dried milk TBS-T for 1.5 hours (Anti-mouse IgG (#NA931V) and Anti-Rabbit IgG (#NA934V)) with horseradish peroxidase-conjugated (GE healthcare, UK). Then the membranes were developed with enhanced chemiluminescence and acquired on Blue Ultra

Autorad Film (GeneMate). Images were electronically scanned, and protein levels were quantified using densitometry.

In mouse studies, whole cell fractions were obtained from mouse hearts. Protein concentrations were measured with the DC protein assay (Bio-Rad Laboratories, Hercules, CA). Equal amounts of protein were loaded into lanes of CriterionTGX (Tris-Glycine eXtended) Stain-Free PAGE gels (BioRad). The gels were electrophoresed and activated using a ChemiDoc MP Visualization System (BioRad) to ensure correct loading. The protein was then transferred to a polyvinylidene difluoride membrane. The membranes were then imaged using a ChemiDoc MP Visualization System to obtain an assessment of proper transfer and to obtain total protein loads. The membranes were then blocked and probed with primary antibodies overnight at 4°C. Immunoblots were next processed with 1:5000 Anti-Rabbit-HRP secondary antibodies (7074S, Cell Signaling) for 1 hour at room temperature. Immunoblots were then probed with a Super Signal West Dura kit (Thermo Fisher Scientific) to visualize signal, followed by visualization using a ChemiDoc MP Visualization System (BioRad). Data were analyzed using Image Lab (BioRad). The total protein images were used as loading controls. For each protein of interest, the portion of the protein load image corresponding to the molecular weight of the protein of interest was used as the loading control. Antibodies used are as followed:

p-BCKDH - Cell Signaling 40368 - 1:2000

t-BCKDH - Cell Signaling 90198 - 1:2000

BCKDK - Novus Biologicals NBP2-15553 - 1:2000

PP2Cm - custom antibody as previously described<sup>8</sup> - 1:2000

### **Exercise Capacity Assessment**

Treadmill exercise performance was assessed using a rodent specific treadmill (IITC, Woodland Hills, California) at 12 weeks post TAC as previously described<sup>12</sup>. Briefly, following treadmill acclimation, mice were subjected to a 30-degree inclined treadmill- running exercise protocol with speed progressively increased from 10 to 18 m/min. Exercise ended at the maximal exhaustion, defined as

inability to maintain running speed despite 5 consecutive seconds contact with the electrical grid. Duration of the running session was recorded.

Treadmill exercise performance was assessed using a rodent specific treadmill (IITC, Woodland Hills, California) at 12 weeks post TAC as previously described<sup>12</sup>. Briefly, following treadmill acclimation, mice were subjected to a 30-degree inclined treadmill- running exercise protocol with speed progressively increased from 10 to 18 m/min. Exercise ended at the maximal exhaustion, defined as inability to maintain running speed despite 5 consecutive seconds contact with the electrical grid. Duration of the running session was recorded.

### **High-resolution Metabolomics (HRM) Sample Preparation**

Metabolites were extracted from heart tissue by homogenizing the samples in ice cold acetonitrile (10:1  $\mu\text{L}$  to mg sample wet weight) using a handheld pestle followed by vortexing and incubation on ice for 30 minutes. Samples were centrifuged at 14,000g for 10 minutes at 4°C to pellet proteins. The supernatants were transferred to autosampler vials and analyzed immediately on a Thermo Scientific Fusion HILIC ESI+/C18 ESI- (85-1,275  $m/z$ ) as previously described<sup>13</sup>.

### **HRM Instrumental Analysis**

Untargeted high-resolution mass spectrometric profiling was performed using a Dionex Ultimate 3000 ultra-high-performance liquid chromatography (UHPLC) system coupled to a Thermo Scientific Fusion. On the Fusion and LC column switching method using a reversed phase C18 column (Higgins Targa C18 2.1 x 50 mm, 3  $\mu\text{M}$  particle size) and a hydrophilic interaction chromatography (HILIC) column (Waters XBridge BEH Amide XP HILIC column 2,1 x 50 mm, 2.6  $\mu\text{M}$  particle size) were used for the analytical separation of extracts before high-resolution mass spectrometry analysis with HILIC/electrospray ionization plus (ESI<sup>+</sup>) and C18/ESI<sup>-</sup> at 120,000-resolution while of ions between 85-1,275  $m/z$ <sup>14</sup>.

### **HRM Data Processing and Statistics**

Mass spectral files in .raw format were converted to .cdf files using xCalibur file converter software (Thermo Fisher, Waltham, MA) and were extracted using apLCMS and xMSanalyzer to generate

feature tables which contain mass spectral features defined by mass-to-charge-ratio (m/z), retention time, and ion abundance<sup>15, 16</sup>. Data were then log<sub>2</sub> transformed and quantile normalized after filtering. Statistical analysis of m/z features (hereafter termed metabolites) was performed using the *limma* function in xmsPANDA, an R-package for statistical analysis of metabolomics data<sup>17-19</sup>. Benjamini-Hochberg false discovery method was used for multiple hypothesis testing correction.

### **HRM Feature Selection, Metabolite Identification and Quantification**

Metabolites with an unadjusted p value less than 0.05 were annotated using xmsAnnotator, a platform which assigns confidence scores for peak annotations. The metabolites were then referenced against an in-house reference library established with authentic chemical standards and matched within 5 ppm of the confirmed mass and within tens of the confirmed retention time<sup>13, 20</sup>. When no standard was available, MS isotopic ratios and MS/MS spectra (ion-trap-based collision-induced dissociation or higher energy collisional dissociation fragmentation as noted) were referenced against online spectral libraries mzCloud and METLIN. Standards were purchased when commercially available or synthesized as described below. Reference standardization was used for quantification of identified metabolites<sup>13</sup>. Quality control samples consisting of pooled plasma were analyzed at the beginning, middle, and end of each analytical run (every twenty samples) to assess chromatographic peak quality ( $\pm 8s$ ) and mass accuracy (observed mass within 5 ppm of expected mass)<sup>13</sup>. Data extraction quality control was performed to extract peaks that were reproducibly detected (technical replicate Pearson's  $R > 0.7$ ). Metabolic set enrichment analysis on annotated metabolites with an adjusted p value less than 0.1 was performed using MetaboAnalyst 5.0. Individual log<sub>2</sub> transformed values for annotated metabolites with unadjusted p values less than 0.05 are listed in **Tables S1-2**. Mean log<sub>2</sub> transformed values and p values for all significantly different metabolites are listed in **Tables S3-5**.

### **Targeted Metabolomic analysis of BCAA**

Metabolites were extracted from heart tissue by homogenizing at 4°C in 1:1 acetonitrile:methanol (10:1  $\mu$ L to mg sample wet weight) using a bead homogenizer. Samples were centrifuged at 1811 RCF for 10 minutes at 4°C to pellet proteins. The supernatants were then mixed with 1:1 acetonitrile:methanol

(4:1 v/v) and incubated for 20 minutes at 4°C. The mixtures were then centrifuged at 1811 RCF for 10 minutes at 4°C and passed through a 0.22mm filter. The supernatants were transferred to autosampler vials and analyzed on a Sciex Q-TRAP 5500 paired with an ExionLC AD UPLC system (Sciex, Farmington, CT). Peaks were quantified with SCIEX OS-MQ software (1.6.1.29803). BCAA concentrations were calculated as nmoles per gram sample wet weight using authentic standards for leucine, isoleucine, and valine.

### **Statistical Analysis**

Data was analyzed in a blinded manner to the genetic background of the animals in each study until all measurements were complete. All data except those generated in metabolomic analysis were analyzed using Prism 8 (GraphPad Software Inc). Normal distribution was tested by the D'Agostino & Pearson test when  $n > 6$  per group. For 2-group comparison, we used a student unpaired 2-tailed  $t$  test, or a Mann-Whitney test when the data did not follow a normal distribution or  $n \leq 6$  per group. For comparison across multiple groups, data were analyzed with 1-way ANOVA analysis followed by a Bonferroni multiple comparison test, or Kruskal-Wallis test when the data did not follow a normal distribution or  $n \leq 6$  per group. For comparison across different timepoints or treatment concentrations, data were analyzed using ordinary 2-way ANOVA analysis followed by a Bonferroni multiple comparison test. A  $p$ -value of  $< 0.05$  was considered statistically significant. Prior to conducting statistical analysis, an outlier test was performed using "ROUT" method developed by Prism 6 to identify and remove any outlier in the data set.



**Table S1: Annotated Metabolites in WT mice.**

|    |           |       |           |                              |             |       |       |       |       |       |       |       |       |       |       |
|----|-----------|-------|-----------|------------------------------|-------------|-------|-------|-------|-------|-------|-------|-------|-------|-------|-------|
| 39 | 368.27942 | 27.1  | HMDB13331 | 3 5-Tetradecadiencarnitine   | 0.50692186  | 22.01 | 22.92 | 22.29 | 22.57 | 24.40 | 21.53 | 21.62 | 22.01 | 21.01 | 22.17 |
| 40 | 372.3106  | 23.2  | HMDB05066 | Tetradecanoylcarnitine       | 0.163772375 | 23.47 | 24.32 | 23.70 | 23.98 | 24.40 | 22.87 | 22.58 | 22.96 | 22.04 | 23.55 |
| 41 | 246.17028 | 33.9  | HMDB00378 | 2-Methylbutyrylcarnitine     | 0.218779619 | 21.42 | 21.99 | 21.30 | 21.61 | 22.82 | 21.05 | 20.62 | 20.20 | 20.05 | 21.09 |
| 42 | 246.17028 | 33.9  | HMDB00688 | Isovalerylcarnitine          | 0.218779619 | 21.42 | 21.99 | 21.30 | 21.61 | 22.82 | 21.05 | 20.62 | 20.20 | 20.05 | 21.09 |
| 43 | 246.17028 | 33.9  | HMDB13128 | Valerylcarnitine             | 0.218779619 | 21.42 | 21.99 | 21.30 | 21.61 | 22.82 | 21.05 | 20.62 | 20.20 | 20.05 | 21.09 |
| 44 | 246.17028 | 33.9  | HMDB41993 | Pivaloylcarnitine            | 0.218779619 | 21.42 | 21.99 | 21.30 | 21.61 | 22.82 | 21.05 | 20.62 | 20.20 | 20.05 | 21.09 |
| 45 | 256.10561 | 53    | HMDB00855 | Nicotinamide riboside        | 0.613630033 | 17.60 | 18.33 | 18.42 | 18.47 | 18.45 | 17.56 | 18.04 | 17.90 | 15.28 | 15.92 |
| 46 | 428.37312 | 25.5  | HMDB00848 | Stearoylcarnitine            | 0.229343411 | 22.85 | 24.25 | 23.31 | 23.31 | 23.76 | 22.76 | 22.23 | 22.26 | 20.97 | 22.53 |
| 47 | 178.08625 | 50.7  | HMDB12490 | 12-Dehydrosalsolinol         | 0.069607536 | 21.65 | 21.71 | 21.76 | 21.88 | 21.17 | 20.51 | 20.94 | 19.98 | 20.16 | 19.46 |
| 48 | 240.10172 | 46.7  | HMDB33519 | N-Ornithyl-L-aurine          | 0.104767364 | 22.05 | 22.91 | 22.47 | 23.23 | 23.29 | 21.68 | 21.00 | 21.55 | 20.31 | 21.69 |
| 49 | 276.18051 | 35.8  | HMDB13131 | Hydroxyhexanoylcarnitine     | 0.163772375 | 21.87 | 23.03 | 21.93 | 23.34 | 23.68 | 21.70 | 20.73 | 21.14 | 20.84 | 21.64 |
| 50 | 260.18558 | 34.1  | HMDB00756 | L-Hexanoylcarnitine          | 0.070313003 | 22.54 | 23.64 | 22.57 | 23.16 | 24.20 | 21.71 | 21.32 | 21.91 | 20.97 | 21.67 |
| 51 | 456.40461 | 25.1  | HMDB06460 | Arachidyl carnitine          | 0.044523452 | 18.95 | 20.29 | 19.03 | 19.24 | 19.88 | 17.42 | 17.03 | 17.99 | 18.01 | 17.71 |
| 52 | 232.15447 | 35.6  | HMDB00736 | Isobutyryl-L-carnitine       | 0.070030482 | 24.12 | 25.21 | 23.84 | 24.96 | 26.50 | 22.47 | 22.33 | 22.74 | 22.64 | 23.03 |
| 53 | 232.15447 | 35.6  | HMDB02013 | Butyrylcarnitine             | 0.070030482 | 24.12 | 25.21 | 23.84 | 24.96 | 26.50 | 22.47 | 22.33 | 22.74 | 22.64 | 23.03 |
| 54 | 248.14943 | 42.4  | HMDB13127 | Hydroxybutyrylcarnitine      | 0.04535137  | 25.88 | 27.59 | 25.62 | 27.14 | 27.91 | 23.66 | 22.26 | 24.54 | 23.30 | 24.22 |
| 55 | 105.00162 | 18.5  | HMDB31520 | 2-Mercaptopropanoic acid     | 0.176993485 | 13.66 | 15.58 | 14.76 | 15.26 | 13.98 | 19.19 | 17.63 | 17.21 | 14.60 | 19.94 |
| 56 | 143.03506 | 22.1  | HMDB31257 | Dimethyl fumarate            | 0.022622051 | 17.95 | 17.17 | 17.51 | 18.62 | 17.75 | 19.31 | 20.12 | 20.59 | 20.68 | 20.64 |
| 57 | 131.03501 | 21    | HMDB01844 | Methylsuccinic acid          | 0.143400106 | 18.77 | 18.73 | 18.37 | 18.98 | 18.65 | 22.29 | 20.63 | 19.74 | 19.30 | 22.38 |
| 58 | 131.03501 | 21    | HMDB06855 | (S)-2-Acetolactate           | 0.143400106 | 18.77 | 18.73 | 18.37 | 18.98 | 18.65 | 22.29 | 20.63 | 19.74 | 19.30 | 22.38 |
| 59 | 159.03005 | 17.5  | HMDB00225 | Oxoadipic acid               | 0.098759863 | 14.99 | 15.98 | 16.67 | 13.99 | 15.36 | 17.70 | 16.68 | 17.68 | 17.11 | 18.53 |
| 60 | 179.05623 | 22.6  | HMDB00122 | D-Glucose                    | 0.032938971 | 20.51 | 19.54 | 19.71 | 20.85 | 19.91 | 21.39 | 22.16 | 22.06 | 22.75 | 22.68 |
| 61 | 401.29136 | 254.7 | HMDB29887 | Sorbitan palmitate           | 0.052649966 | 21.38 | 21.07 | 20.69 | 21.60 | 20.49 | 23.64 | 22.05 | 22.97 | 22.42 | 23.09 |
| 62 | 153.01938 | 19.9  | HMDB01856 | Protocatechuic acid          | 0.280057722 | 15.56 | 15.74 | 15.52 | 15.31 | 16.10 | 15.41 | 16.45 | 18.48 | 18.17 | 17.88 |
| 63 | 153.01938 | 19.9  | HMDB13677 | 35-Dihydroxybenzoic acid     | 0.280057722 | 15.56 | 15.74 | 15.52 | 15.31 | 16.10 | 15.41 | 16.45 | 18.48 | 18.17 | 17.88 |
| 64 | 299.22311 | 235.4 | HMDB11531 | MG(0:014:1(9Z):0:0)          | 0.079883616 | 19.55 | 20.09 | 19.59 | 20.75 | 19.54 | 21.62 | 20.68 | 21.34 | 21.24 | 22.19 |
| 65 | 178.05115 | 20    | HMDB00714 | Hippuric acid                | 0.065723444 | 19.02 | 20.47 | 20.01 | 20.30 | 20.29 | 21.12 | 22.04 | 21.35 | 21.39 | 21.67 |
| 66 | 178.05115 | 20    | HMDB00992 | 3-Succinoylpyridine          | 0.065723444 | 19.02 | 20.47 | 20.01 | 20.30 | 20.29 | 21.12 | 22.04 | 21.35 | 21.39 | 21.67 |
| 67 | 253.21774 | 237.4 | HMDB03229 | Palmitoleic acid             | 0.097943032 | 25.07 | 26.06 | 25.38 | 26.02 | 25.26 | 26.77 | 26.08 | 27.15 | 27.22 | 27.73 |
| 68 | 277.21772 | 223.7 | HMDB01388 | Alpha-Linolenic acid         | 0.285120969 | 25.32 | 26.28 | 26.05 | 26.25 | 26.53 | 26.88 | 26.24 | 28.38 | 27.12 | 27.83 |
| 69 | 267.23333 | 256.1 | HMDB40888 | 12-Heptadecanedione          | 0.143400106 | 21.26 | 22.24 | 21.65 | 22.36 | 21.63 | 23.26 | 22.20 | 23.22 | 22.79 | 23.57 |
| 70 | 396.27634 | 237   | HMDB13628 | PGF2a ethanolamide           | 0.516652173 | 16.66 | 15.71 | 16.00 | 17.18 | 14.93 | 17.12 | 16.26 | 16.99 | 17.80 | 17.56 |
| 71 | 187.00726 | 20.5  | HMDB11635 | p-Cresol sulfate             | 0.439759635 | 20.43 | 20.85 | 20.49 | 20.37 | 20.70 | 20.18 | 21.29 | 22.38 | 22.04 | 21.81 |
| 72 | 289.21764 | 222.6 | HMDB00031 | Androsterone                 | 0.541513018 | 15.90 | 16.93 | 16.24 | 15.87 | 16.51 | 16.92 | 16.43 | 17.12 | 16.75 | 17.42 |
| 73 | 228.08159 | 21.8  | HMDB03045 | Ergothioneine                | 0.55778774  | 17.11 | 17.33 | 17.02 | 17.18 | 16.81 | 17.18 | 17.50 | 17.61 | 17.57 | 17.72 |
| 74 | 215.16539 | 80.4  | HMDB10728 | (R)-3-Hydroxydodecanoic acid | 0.502984064 | 18.66 | 19.81 | 19.04 | 19.10 | 19.40 | 18.45 | 18.47 | 19.02 | 18.61 | 18.45 |
| 75 | 117.05571 | 20.3  | HMDB00754 | 3-Hydroxyisovaleric acid     | 0.477511773 | 19.79 | 20.72 | 20.46 | 20.70 | 20.68 | 19.79 | 19.89 | 19.75 | 19.59 | 20.31 |
| 76 | 193.03528 | 143.8 | HMDB00127 | D-Glucuronic acid            | 0.447385823 | 20.49 | 21.28 | 21.42 | 21.53 | 20.85 | 20.34 | 20.46 | 20.80 | 20.55 | 20.34 |
| 77 | 184.09812 | 19.9  | HMDB06348 | Pseudoecgonine               | 0.187946883 | 16.59 | 16.63 | 16.74 | 16.50 | 16.51 | 15.67 | 16.10 | 15.88 | 16.26 | 15.96 |
| 78 | 215.16556 | 37.7  | HMDB02059 | 12-Hydroxydodecanoic acid    | 0.076085695 | 20.28 | 20.94 | 20.56 | 20.41 | 20.67 | 19.47 | 19.76 | 19.82 | 19.72 | 19.17 |
| 79 | 225.18607 | 178.6 | HMDB02000 | Myristoleic acid             | 0.098759863 | 21.46 | 22.75 | 22.07 | 21.62 | 22.24 | 20.51 | 20.67 | 21.13 | 20.85 | 21.14 |
| 80 | 295.22819 | 158.4 | HMDB04701 | 910-Epoxyoctadecenoic acid   | 0.155048129 | 22.50 | 23.36 | 22.99 | 23.14 | 23.17 | 21.70 | 21.04 | 22.96 | 21.59 | 21.71 |
| 81 | 103.04007 | 19.6  | HMDB00011 | (R)-3-Hydroxybutyric acid    | 0.05702144  | 22.16 | 23.06 | 22.53 | 22.59 | 22.68 | 21.09 | 20.16 | 21.73 | 20.88 | 21.42 |
| 82 | 345.20754 | 82.7  | HMDB00015 | Cortexolone                  | 0.452078716 | 13.28 | 16.37 | 14.49 | 14.97 | 14.99 | 14.01 | 13.63 | 11.55 | 12.55 | 14.25 |
| 83 | 187.1342  | 22.5  | HMDB10725 | (R)-3-Hydroxydecanoic acid   | 0.032938971 | 19.33 | 20.33 | 19.50 | 19.37 | 19.87 | 17.78 | 18.29 | 17.96 | 18.31 | 17.54 |
| 84 | 159.10273 | 21.4  | HMDB01954 | 3-Hydroxyoctanoic acid       | 0.035212065 | 18.51 | 19.73 | 18.37 | 18.10 | 18.75 | 16.87 | 17.10 | 16.64 | 17.15 | 16.20 |
| 85 | 117.01946 | 18.9  | HMDB00254 | Succinic acid                | 0.222183641 | 23.87 | 24.49 | 24.33 | 24.54 | 25.05 | 23.50 | 23.15 | 22.78 | 19.84 | 22.97 |

**Table S2: Annotated Metabolites in 3-MST KO mice.**

| number | mz        | time  | chemical_ID | Name                                            | adjusted.P.value | X3mstKO_sham1_001 |       |       |       |       | X3mstKO_tac1_001 |       |       |       |       |
|--------|-----------|-------|-------------|-------------------------------------------------|------------------|-------------------|-------|-------|-------|-------|------------------|-------|-------|-------|-------|
|        |           |       |             |                                                 |                  |                   |       |       |       |       |                  |       |       |       |       |
| 1      | 340.10265 | 39.2  | HMDB10362   | 6-Hydroxy-5-methoxyindole glucuronide           | 0.141499146      | 7.54              | 12.57 | 6.55  | 6.55  | 6.55  | 17.33            | 6.55  | 13.91 | 12.35 | 14.23 |
| 2      | 342.13938 | 96.9  | HMDB06591   | Lactosamine                                     | 0.051901094      | 11.39             | 11.39 | 11.39 | 11.39 | 12.39 | 15.65            | 18.65 | 20.43 | 13.46 | 14.33 |
| 3      | 289.08606 | 84.1  | HMDB31870   | gamma-Glutamyl-S-(1-propenyl)cysteine sulfoxide | 0.101584475      | 10.80             | 15.37 | 10.80 | 11.80 | 13.38 | 19.80            | 14.00 | 13.71 | 18.00 | 18.03 |
| 4      | 123.59425 | 84    | HMDB28964   | Lysyl-Valine                                    | 0.125529361      | 15.47             | 18.70 | 15.48 | 16.03 | 17.67 | 22.74            | 17.09 | 17.75 | 20.48 | 20.41 |
| 5      | 234.1081  | 67    | HMDB29037   | SerinyI-Glutamine                               | 0.063827932      | 18.54             | 19.89 | 19.20 | 19.61 | 19.82 | 22.39            | 20.47 | 23.90 | 20.97 | 21.10 |
| 6      | 100.02158 | 65.7  | HMDB05843   | Allyl isothiocyanate                            | 0.011092958      | 14.51             | 15.49 | 14.47 | 14.80 | 15.21 | 17.49            | 16.41 | 16.65 | 16.27 | 17.05 |
| 7      | 100.02158 | 65.7  | HMDB33116   | 4-Methylthiazole                                | 0.011092958      | 14.51             | 15.49 | 14.47 | 14.80 | 15.21 | 17.49            | 16.41 | 16.65 | 16.27 | 17.05 |
| 8      | 808.51303 | 51.9  | HMDB12425   | PS(20:3(8Z11Z14Z)18:3(9Z12Z15Z))                | 0.136425217      | 12.78             | 14.60 | 12.78 | 12.78 | 12.78 | 17.58            | 14.81 | 14.21 | 14.47 | 13.78 |
| 9      | 216.06316 | 96.6  | HMDB00114   | Glycerophosphorylethanolamine                   | 0.160603393      | 17.85             | 20.21 | 17.93 | 18.47 | 19.57 | 22.80            | 19.53 | 18.81 | 20.73 | 21.05 |
| 10     | 703.57506 | 36.6  | HMDB13464   | SM(d18:016:1(9Z))                               | 0.144236335      | 15.81             | 16.39 | 14.29 | 17.43 | 16.78 | 19.50            | 16.90 | 17.01 | 17.37 | 18.27 |
| 11     | 146.08118 | 73.2  | HMDB12151   | 2-Keto-6-aminocaproate                          | 0.016528718      | 18.23             | 18.50 | 18.52 | 17.75 | 18.81 | 20.66            | 19.77 | 19.70 | 19.45 | 20.24 |
| 12     | 244.11138 | 68.7  | HMDB01458   | Biotin amide                                    | 0.009193018      | 17.95             | 18.24 | 17.72 | 17.95 | 18.26 | 20.05            | 19.25 | 19.08 | 19.34 | 19.88 |
| 13     | 175.07127 | 62.3  | HMDB00854   | Formiminoglutamic acid                          | 0.125529361      | 15.13             | 17.34 | 15.97 | 15.56 | 16.46 | 18.42            | 17.11 | 16.21 | 17.52 | 18.66 |
| 14     | 175.07127 | 62.3  | HMDB06028   | N-Acetylasparagine                              | 0.125529361      | 15.13             | 17.34 | 15.97 | 15.56 | 16.46 | 18.42            | 17.11 | 16.21 | 17.52 | 18.66 |
| 15     | 150.05835 | 47.6  | HMDB00696   | L-Methionine                                    | 0.064013297      | 23.96             | 24.58 | 23.66 | 23.40 | 23.84 | 25.99            | 24.89 | 24.28 | 25.18 | 25.66 |
| 16     | 104.05291 | 46.7  | HMDB33875   | 23-Dihydrothiophene                             | 0.064251874      | 20.96             | 21.55 | 20.56 | 20.35 | 20.78 | 22.70            | 21.86 | 21.21 | 22.08 | 22.59 |
| 17     | 104.05291 | 46.7  | HMDB33922   | Divinyl sulfide                                 | 0.064251874      | 20.96             | 21.55 | 20.56 | 20.35 | 20.78 | 22.70            | 21.86 | 21.21 | 22.08 | 22.59 |
| 18     | 132.10194 | 43.9  | HMDB00687   | L-Leucine                                       | 0.022135178      | 26.07             | 26.50 | 26.03 | 25.97 | 26.36 | 27.90            | 27.23 | 26.80 | 27.36 | 27.71 |
| 19     | 238.04469 | 96.4  | HMDB59660   | sn-glycero-3-Phosphoethanolamine                | 0.161231062      | 16.35             | 18.16 | 16.19 | 16.71 | 17.78 | 19.32            | 17.79 | 17.11 | 18.12 | 18.87 |
| 20     | 120.06557 | 67.9  | HMDB00167   | L-Threonine                                     | 0.118104285      | 22.56             | 23.94 | 23.03 | 23.20 | 23.73 | 25.38            | 24.03 | 23.41 | 24.54 | 24.99 |
| 21     | 522.35573 | 26.6  | HMDB02815   | LysoPC(18:1(9Z))                                | 0.123236824      | 21.62             | 21.88 | 21.21 | 21.42 | 21.72 | 24.11            | 22.02 | 21.77 | 22.65 | 22.97 |
| 22     | 182.0811  | 51.1  | HMDB00158   | L-Tyrosine                                      | 0.100983924      | 21.46             | 22.52 | 21.58 | 21.29 | 21.79 | 23.86            | 22.39 | 22.11 | 22.83 | 23.10 |
| 23     | 774.60091 | 50.5  | HMDB09255   | PE(20:1(11Z)18:0)                               | 0.174486393      | 13.30             | 15.33 | 14.69 | 14.71 | 15.82 | 15.88            | 15.56 | 15.83 | 15.21 | 16.09 |
| 24     | 800.61607 | 52.8  | HMDB09008   | PE(18:022:2(13Z16Z))                            | 0.105506897      | 17.80             | 17.41 | 18.09 | 17.64 | 18.21 | 19.16            | 18.64 | 17.89 | 18.58 | 19.30 |
| 25     | 306.08068 | 53.4  | HMDB03333   | 8-Hydroxy-deoxyguanosine                        | 0.039950186      | 18.35             | 18.78 | 18.32 | 18.17 | 18.91 | 19.74            | 19.16 | 19.22 | 19.27 | 19.53 |
| 26     | 166.08628 | 41.1  | HMDB00159   | L-Phenylalanine                                 | 0.113789959      | 25.20             | 25.77 | 25.26 | 25.12 | 25.50 | 26.91            | 25.68 | 25.64 | 26.17 | 26.40 |
| 27     | 118.0863  | 54.5  | HMDB00043   | Betaine                                         | 0.059747568      | 26.00             | 25.70 | 26.33 | 25.91 | 26.09 | 26.97            | 26.99 | 26.47 | 26.39 | 27.05 |
| 28     | 118.0863  | 54.5  | HMDB00883   | L-Valine                                        | 0.059747568      | 26.00             | 25.70 | 26.33 | 25.91 | 26.09 | 26.97            | 26.99 | 26.47 | 26.39 | 27.05 |
| 29     | 118.0863  | 54.5  | HMDB01382   | Vaporole                                        | 0.059747568      | 26.00             | 25.70 | 26.33 | 25.91 | 26.09 | 26.97            | 26.99 | 26.47 | 26.39 | 27.05 |
| 30     | 792.55425 | 39.3  | HMDB09653   | PE(22:5(7Z10Z13Z16Z19Z)18:1(9Z))                | 0.080195108      | 21.95             | 22.24 | 22.03 | 21.92 | 22.00 | 23.27            | 22.39 | 22.30 | 22.84 | 23.17 |
| 31     | 116.07066 | 54    | HMDB00162   | L-Proline                                       | 0.134225666      | 25.14             | 24.91 | 24.87 | 24.54 | 24.74 | 25.72            | 26.28 | 25.15 | 24.83 | 25.87 |
| 32     | 175.10772 | 65.4  | HMDB28854   | Glycyl-Valine                                   | 0.161159566      | 19.16             | 20.16 | 19.11 | 19.21 | 19.62 | 20.85            | 20.06 | 19.63 | 19.72 | 20.52 |
| 33     | 766.5746  | 34.7  | HMDB08488   | PC(20:4(8Z11Z14Z17Z)P-16:0)                     | 0.125529361      | 21.46             | 21.18 | 21.33 | 21.22 | 21.19 | 21.08            | 20.83 | 20.78 | 20.92 | 20.91 |
| 34     | 142.08627 | 48.5  | HMDB29427   | L-Hypoglycin A                                  | 0.15315661       | 20.46             | 20.92 | 20.76 | 20.78 | 20.85 | 20.09            | 20.62 | 20.33 | 20.34 | 20.47 |
| 35     | 820.62089 | 48.5  | HMDB08686   | PC(22:5(4Z7Z10Z13Z16Z)P-18:0)                   | 0.155409923      | 18.60             | 18.54 | 19.03 | 18.29 | 18.45 | 17.72            | 17.98 | 17.98 | 18.35 | 18.46 |
| 36     | 141.06587 | 289.3 | HMDB02820   | Methylimidazoleacetic acid                      | 0.125529361      | 20.34             | 20.66 | 20.09 | 20.33 | 20.61 | 19.60            | 20.06 | 19.79 | 20.17 | 19.97 |
| 37     | 177.10226 | 32.1  | HMDB00259   | Serotonin                                       | 0.16716594       | 21.07             | 20.29 | 21.09 | 21.06 | 20.81 | 19.40            | 20.75 | 20.56 | 20.21 | 20.24 |
| 38     | 193.09717 | 36.6  | HMDB01004   | Oxoamide                                        | 0.134654206      | 20.11             | 19.72 | 20.24 | 20.18 | 20.15 | 18.61            | 19.94 | 19.87 | 19.09 | 19.40 |
| 39     | 244.0926  | 54.6  | HMDB00089   | Cytidine                                        | 0.125136689      | 20.79             | 21.51 | 21.13 | 21.02 | 21.42 | 21.11            | 19.78 | 20.38 | 20.75 | 19.69 |
| 40     | 113.03462 | 40.4  | HMDB00300   | Uracil                                          | 0.106741808      | 20.84             | 20.96 | 21.04 | 20.89 | 21.14 | 20.35            | 20.16 | 20.93 | 19.96 | 19.30 |

|     |           |       |           |                                          |             |       |       |       |       |       |       |       |       |       |       |
|-----|-----------|-------|-----------|------------------------------------------|-------------|-------|-------|-------|-------|-------|-------|-------|-------|-------|-------|
| 41  | 127.0866  | 36.8  | HMDB01169 | 4-Aminophenol                            | 0.118359645 | 21.77 | 21.44 | 21.91 | 21.84 | 21.77 | 19.94 | 21.48 | 21.42 | 20.71 | 20.98 |
| 42  | 155.11791 | 32    | HMDB04989 | m-Tyramine                               | 0.067374876 | 24.46 | 23.96 | 24.33 | 24.19 | 24.13 | 22.70 | 23.78 | 23.62 | 23.08 | 23.60 |
| 43  | 274.20118 | 35.3  | HMDB13238 | Heptanoylcarnitine                       | 0.112202542 | 24.28 | 24.13 | 24.33 | 24.05 | 24.13 | 22.15 | 23.93 | 23.46 | 23.52 | 23.39 |
| 44  | 161.10733 | 32.3  | HMDB00303 | Tryptamine                               | 0.119573825 | 21.72 | 20.81 | 21.73 | 21.47 | 21.30 | 19.40 | 21.28 | 20.70 | 20.26 | 20.50 |
| 45  | 246.17028 | 33.9  | HMDB00378 | 2-Methylbutyrylcarnitine                 | 0.098307214 | 21.55 | 21.98 | 22.19 | 21.45 | 21.72 | 21.87 | 20.39 | 20.02 | 20.67 | 20.67 |
| 46  | 246.17028 | 33.9  | HMDB00688 | Isovalerylcarnitine                      | 0.098307214 | 21.55 | 21.98 | 22.19 | 21.45 | 21.72 | 21.87 | 20.39 | 20.02 | 20.67 | 20.67 |
| 47  | 246.17028 | 33.9  | HMDB13128 | Valerylcarnitine                         | 0.098307214 | 21.55 | 21.98 | 22.19 | 21.45 | 21.72 | 21.87 | 20.39 | 20.02 | 20.67 | 20.67 |
| 48  | 246.17028 | 33.9  | HMDB41993 | Pivaloylcarnitine                        | 0.098307214 | 21.55 | 21.98 | 22.19 | 21.45 | 21.72 | 21.87 | 20.39 | 20.02 | 20.67 | 20.67 |
| 49  | 276.18051 | 35.8  | HMDB13131 | Hydroxyhexanoylcarnitine                 | 0.043665838 | 22.27 | 22.94 | 22.91 | 22.83 | 22.77 | 22.13 | 20.68 | 20.61 | 21.66 | 21.77 |
| 50  | 456.40461 | 25.1  | HMDB06460 | Arachidyl carnitine                      | 0.135164834 | 19.07 | 19.62 | 19.12 | 18.89 | 19.22 | 19.47 | 15.02 | 17.95 | 17.34 | 17.43 |
| 51  | 240.10172 | 46.7  | HMDB33519 | N-Ornithyl-L-tyrosine                    | 0.0035634   | 23.32 | 23.62 | 23.32 | 23.17 | 23.46 | 21.89 | 21.03 | 21.22 | 21.77 | 21.48 |
| 52  | 260.18558 | 34.1  | HMDB00705 | Hexanoylcarnitine                        | 0.051033775 | 23.40 | 23.49 | 23.42 | 23.49 | 23.17 | 22.93 | 19.48 | 21.20 | 21.61 | 21.25 |
| 53  | 260.18558 | 34.1  | HMDB00756 | L-Hexanoylcarnitine                      | 0.051033775 | 23.40 | 23.49 | 23.42 | 23.49 | 23.17 | 22.93 | 19.48 | 21.20 | 21.61 | 21.25 |
| 54  | 248.14943 | 42.4  | HMDB13127 | Hydroxybutyrylcarnitine                  | 0.003875555 | 27.27 | 27.33 | 27.15 | 27.18 | 27.11 | 24.68 | 24.52 | 22.71 | 24.28 | 24.61 |
| 55  | 132.03023 | 21.5  | HMDB00191 | L-Aspartic acid                          | 0.07261269  | 18.43 | 20.69 | 18.54 | 19.13 | 20.11 | 25.04 | 20.87 | 19.92 | 22.80 | 22.90 |
| 56  | 226.99684 | 20.7  | HMDB00094 | Citric acid                              | 0.005623905 | 17.25 | 17.62 | 16.62 | 15.96 | 16.95 | 19.71 | 18.32 | 19.50 | 18.76 | 19.35 |
| 57  | 885.54997 | 253.4 | HMDB09842 | PI(18:1(9Z)20:3(5Z8Z11Z))                | 0.177940975 | 17.70 | 19.96 | 18.74 | 18.23 | 19.12 | 23.37 | 19.03 | 18.77 | 21.21 | 20.70 |
| 58  | 885.54997 | 253.4 | HMDB09894 | PI(20:4(5Z8Z11Z)14Z)18:0)                | 0.177940975 | 17.70 | 19.96 | 18.74 | 18.23 | 19.12 | 23.37 | 19.03 | 18.77 | 21.21 | 20.70 |
| 59  | 195.05127 | 20.9  | HMDB00565 | Galactonic acid                          | 0.083073623 | 16.70 | 17.39 | 16.82 | 16.52 | 17.08 | 20.67 | 17.71 | 17.29 | 18.37 | 19.62 |
| 60  | 188.98665 | 20    | HMDB59724 | Pyrocatechol sulfate                     | 0.00471047  | 17.07 | 16.27 | 16.76 | 16.63 | 16.70 | 18.72 | 19.21 | 18.15 | 17.76 | 18.53 |
| 61  | 209.03039 | 99.2  | HMDB00663 | Glucuric acid                            | 0.086528238 | 14.25 | 14.40 | 15.32 | 12.62 | 14.20 | 17.23 | 15.52 | 15.68 | 14.71 | 16.05 |
| 62  | 174.04099 | 17.8  | HMDB00812 | N-Acetyl-L-aspartic acid                 | 0.166026464 | 17.46 | 18.43 | 17.57 | 17.82 | 18.16 | 22.18 | 17.95 | 18.63 | 19.17 | 19.40 |
| 63  | 830.69924 | 39.3  | HMDB13441 | PC(o-20:020:0)                           | 0.010070726 | 14.83 | 15.25 | 14.64 | 14.82 | 15.75 | 17.00 | 16.09 | 16.10 | 16.98 | 16.79 |
| 64  | 183.00673 | 21.1  | HMDB00606 | D-2-Hydroxyglutaric acid                 | 0.077235609 | 19.71 | 20.10 | 19.82 | 19.75 | 20.27 | 22.81 | 20.87 | 20.89 | 20.19 | 22.04 |
| 65  | 181.0717  | 21.7  | HMDB00247 | Sorbitol                                 | 0.056139341 | 17.08 | 16.32 | 16.17 | 16.75 | 15.47 | 17.02 | 17.25 | 17.92 | 18.82 | 17.84 |
| 66  | 178.05115 | 20    | HMDB00714 | Hippuric acid                            | 0.003263799 | 20.07 | 20.55 | 20.37 | 20.37 | 20.61 | 22.15 | 21.71 | 21.97 | 21.45 | 21.62 |
| 67  | 452.27895 | 207.3 | HMDB11473 | LysoPE(0:016:0)                          | 0.162807081 | 18.95 | 21.79 | 19.29 | 20.88 | 20.68 | 21.72 | 21.45 | 21.41 | 22.20 | 20.93 |
| 68  | 147.02993 | 21.4  | HMDB00426 | Citramalic acid                          | 0.072947809 | 20.03 | 20.74 | 20.14 | 20.40 | 20.58 | 22.89 | 21.21 | 20.90 | 21.04 | 21.87 |
| 69  | 129.01935 | 18.6  | HMDB00634 | Citraconic acid                          | 0.023795461 | 23.54 | 24.42 | 23.74 | 24.11 | 24.21 | 25.61 | 25.07 | 24.68 | 24.77 | 25.30 |
| 70  | 767.48746 | 225.8 | HMDB10652 | PG(18:2(9Z12Z)18:3(9Z12Z15Z))            | 0.126897252 | 17.53 | 18.24 | 17.30 | 17.74 | 17.88 | 19.35 | 19.56 | 17.31 | 18.62 | 19.21 |
| 71  | 817.50284 | 228.8 | HMDB10673 | PG(18:3(6Z9Z12Z)22:5(7Z10Z13Z16Z19Z))    | 0.122103896 | 19.78 | 21.08 | 20.24 | 20.19 | 20.71 | 22.60 | 21.25 | 21.20 | 20.82 | 21.04 |
| 72  | 228.08159 | 21.8  | HMDB03045 | Ergothioneine                            | 0.010609023 | 17.19 | 17.13 | 16.97 | 17.06 | 17.12 | 17.74 | 18.40 | 18.11 | 17.72 | 18.36 |
| 73  | 423.27592 | 233.8 | HMDB00311 | 3b4b7a12a-Tetrahydroxy-5b-cholanoic acid | 0.052809896 | 22.07 | 21.78 | 21.80 | 21.70 | 22.54 | 23.43 | 22.75 | 22.24 | 23.09 | 23.11 |
| 74  | 480.31002 | 215.3 | HMDB10381 | LysoPC(15:0)                             | 0.091309314 | 20.86 | 22.11 | 21.30 | 21.77 | 22.18 | 23.33 | 22.21 | 22.20 | 22.56 | 22.62 |
| 75  | 151.06134 | 21.3  | HMDB01851 | L-Arabitol                               | 0.126987939 | 17.13 | 16.66 | 16.69 | 16.76 | 16.78 | 18.52 | 17.19 | 16.72 | 18.09 | 17.68 |
| 76  | 165.04057 | 21.1  | HMDB60256 | L-Xylonate                               | 0.148443348 | 18.70 | 18.99 | 18.62 | 18.83 | 19.10 | 20.74 | 19.45 | 19.37 | 18.91 | 19.54 |
| 77  | 173.00928 | 23.2  | HMDB00072 | cis-Aconitic acid                        | 0.087226459 | 19.23 | 18.81 | 19.13 | 18.85 | 18.87 | 20.59 | 19.39 | 19.66 | 19.67 | 19.35 |
| 78  | 107.05022 | 20.1  | HMDB02048 | m-Cresol                                 | 0.074040616 | 16.87 | 16.45 | 16.27 | 16.68 | 16.51 | 17.93 | 17.52 | 17.03 | 16.83 | 17.21 |
| 79  | 187.00726 | 20.5  | HMDB11635 | p-Sulfate sulfate                        | 0.062992239 | 20.84 | 20.54 | 20.25 | 20.50 | 20.71 | 21.84 | 21.24 | 21.03 | 21.04 | 21.17 |
| 80  | 130.08728 | 24.2  | HMDB00172 | L-Isoleucine                             | 0.070894308 | 21.51 | 22.37 | 21.85 | 22.02 | 21.98 | 22.46 | 23.04 | 22.46 | 22.53 | 22.54 |
| 81  | 204.06696 | 19.2  | HMDB00671 | Indolelactic acid                        | 0.157698264 | 16.31 | 16.68 | 15.79 | 15.67 | 16.35 | 17.34 | 16.80 | 16.29 | 16.55 | 16.94 |
| 82  | 217.11977 | 24.8  | HMDB29042 | Serinyll-Isoleucine                      | 0.1796041   | 19.75 | 19.90 | 20.04 | 20.07 | 20.05 | 19.34 | 19.62 | 19.89 | 19.32 | 19.76 |
| 83  | 285.22277 | 240.2 | HMDB06221 | 13-cis Retinol                           | 0.176090038 | 17.17 | 17.60 | 17.16 | 17.29 | 17.32 | 17.14 | 16.86 | 17.20 | 16.67 | 16.74 |
| 84  | 152.00247 | 17.6  | HMDB00996 | 3-Sulfinoalanine                         | 0.138418028 | 23.44 | 23.46 | 23.56 | 23.71 | 23.54 | 22.95 | 23.47 | 23.33 | 22.83 | 22.99 |
| 85  | 142.08726 | 280.4 | HMDB04827 | Proline betaine                          | 0.089989787 | 14.66 | 14.74 | 15.00 | 15.10 | 14.82 | 14.38 | 14.40 | 14.50 | 14.31 | 14.52 |
| 86  | 182.0131  | 17.2  | HMDB02205 | L-Homocysteic acid                       | 0.171996992 | 17.33 | 17.48 | 17.54 | 17.54 | 17.51 | 17.12 | 17.46 | 17.07 | 16.39 | 17.06 |
| 87  | 206.08267 | 19.9  | HMDB00512 | N-Acetyl-L-phenylalanine                 | 0.160428582 | 21.14 | 21.14 | 21.32 | 21.37 | 21.26 | 20.18 | 21.08 | 21.17 | 20.40 | 20.85 |
| 88  | 172.09805 | 19.2  | HMDB02087 | Isovalerylsarcosine                      | 0.127485365 | 22.66 | 22.63 | 22.83 | 22.92 | 22.80 | 21.63 | 22.60 | 22.61 | 21.62 | 22.27 |
| 89  | 158.08238 | 19    | HMDB29230 | 4-Hydroxystachydrine                     | 0.157510246 | 21.21 | 21.10 | 21.35 | 21.44 | 21.33 | 20.05 | 21.23 | 21.18 | 20.10 | 20.73 |
| 90  | 188.07172 | 33.7  | HMDB02302 | 3-Indolepropionic acid                   | 0.184113977 | 17.17 | 17.14 | 17.47 | 17.55 | 17.49 | 15.68 | 17.48 | 16.93 | 16.60 | 16.81 |
| 91  | 103.00366 | 21.9  | HMDB00691 | Malonic acid                             | 0.082152336 | 17.45 | 16.49 | 17.17 | 17.38 | 16.44 | 16.27 | 16.60 | 16.08 | 16.01 | 16.07 |
| 92  | 235.07581 | 23.6  | HMDB29045 | Serinyll-Methionine                      | 0.117500612 | 17.30 | 17.51 | 18.00 | 18.31 | 17.80 | 16.16 | 17.69 | 17.38 | 16.01 | 16.83 |
| 93  | 396.3124  | 251.4 | HMDB13207 | 9-Hexadecenoylcarnitine                  | 0.125236396 | 18.93 | 17.94 | 18.69 | 18.52 | 19.14 | 19.09 | 17.32 | 17.20 | 17.16 | 17.10 |
| 94  | 269.21259 | 159.4 | HMDB30973 | 9-Oxohexadecanoic acid                   | 0.071785454 | 21.73 | 22.63 | 21.70 | 22.04 | 22.19 | 21.43 | 21.82 | 20.30 | 20.91 | 20.14 |
| 95  | 215.16539 | 80.4  | HMDB02059 | 12-Hydroxydodecanoic acid                | 0.006296605 | 19.17 | 19.58 | 19.31 | 19.71 | 19.77 | 18.39 | 17.96 | 18.55 | 18.61 | 18.04 |
| 96  | 297.24386 | 184.5 | HMDB30980 | 10-Oxooctadecanoic acid                  | 0.01187075  | 24.20 | 25.24 | 24.36 | 24.86 | 24.65 | 23.86 | 23.24 | 23.37 | 23.56 | 23.11 |
| 97  | 166.01796 | 18    | HMDB06462 | Homocysteinesulfinic acid                | 0.12070305  | 26.17 | 25.85 | 26.20 | 26.39 | 26.11 | 23.11 | 25.99 | 25.78 | 24.24 | 24.95 |
| 98  | 103.04007 | 19.6  | HMDB00336 | (R)-3-Hydroxyisobutyric acid             | 0.003633243 | 22.11 | 22.35 | 22.35 | 22.36 | 22.65 | 21.07 | 21.52 | 20.67 | 20.97 | 20.90 |
| 99  | 351.25461 | 175.4 | HMDB11540 | MG(0:018:3(9Z12Z15Z)0:0)                 | 0.065942735 | 19.55 | 18.60 | 19.63 | 19.32 | 18.97 | 16.45 | 18.80 | 18.62 | 17.32 | 17.23 |
| 100 | 249.05552 | 17.3  | HMDB01049 | Gamma-Glutamylcysteine                   | 0.095337632 | 17.81 | 18.04 | 17.89 | 18.57 | 17.96 | 14.69 | 17.74 | 17.44 | 15.89 | 16.78 |
| 101 | 117.01946 | 18.9  | HMDB00254 | Succinic acid                            | 0.021905145 | 24.15 | 24.79 | 24.36 | 24.58 | 24.26 | 24.05 | 22.50 | 21.60 | 22.73 | 22.42 |
| 102 | 159.10273 | 21.4  | HMDB02264 | (R)-2-Hydroxycaprylic acid               | 0.019645152 | 18.47 | 18.67 | 18.53 | 18.77 | 18.67 | 16.18 | 16.58 | 18.02 | 15.95 | 17.52 |
| 103 | 191.04968 | 18.8  | HMDB28768 | Cysteinyl-Alanine                        | 0.138800384 | 18.40 | 16.09 | 17.89 | 18.38 | 17.16 | 13.78 | 18.18 | 15.26 | 14.78 | 16.10 |
| 104 | 295.22819 | 158.4 | HMDB04702 | 1213-EpOME                               | 0.101010227 | 23.55 | 24.37 | 23.54 | 23.06 | 23.54 | 24.06 | 19.09 | 21.36 | 21.32 | 21.58 |
| 105 | 243.1968  | 168.5 | HMDB02261 | 2-Hydroxymyristic acid                   | 0.058439422 | 20.29 | 20.91 | 20.42 | 20.57 | 20.92 | 20.23 | 15.38 | 17.92 | 18.85 | 17.79 |

**Table S3: Metabolites That Are Common to Wildtype and 3-MST KO Mice following TAC.**

Changes in only 4 metabolites (1 up and 3 down) were found common to both WT and 3-MST KO hearts.

| Metabolite                | Identifier (HMDB) | WT Sham      | WT TAC       | Adjusted P value | 3-MST KO Sham | 3-MST KO TAC | Adjusted P Value |
|---------------------------|-------------------|--------------|--------------|------------------|---------------|--------------|------------------|
| L-Hexanoylcarnitine       | HMDB00756         | 23.22 ± 0.32 | 21.52 ± 0.17 | 0.070            | 23.39 ± 0.06  | 21.29 ± 0.55 | 0.051            |
| Hydroxybutyrylcarnitine   | HMDB13127         | 26.83 ± 0.46 | 23.60 ± 0.40 | 0.045            | 27.21 ± 0.04  | 24.16 ± 0.37 | 0.003            |
| Hippuric acid             | HMDB00714         | 20.02 ± 0.26 | 21.51 ± 0.16 | 0.065            | 20.39 ± 0.09  | 21.78 ± 0.12 | 0.003            |
| 12-Hydroxydodecanoic acid | HMDB02059         | 20.57 ± 0.11 | 19.59 ± 0.12 | 0.076            | 19.51 ± 0.12  | 18.31 ± 0.13 | 0.006            |

**Table S4: Metabolites That Are Unique to Wildtype Mice following TAC.**

In WT hearts subjected to 12 weeks of TAC a total of 17 metabolites (9 up and 8 down) were significantly changed compared to Sham-TAC WT.

| <b>Metabolite</b>          | <b>Identifier (HMDB)</b> | <b>Sham</b>  | <b>TAC</b>   | <b>Adjusted P value</b> |
|----------------------------|--------------------------|--------------|--------------|-------------------------|
| Stearoyllactic acid        | HMDB33372                | 16.52 ± 0.08 | 18.18 ± 0.36 | 0.0839                  |
| MG(0:018:2(9Z12Z)0:0)      | HMDB11538                | 18.26 ± 0.12 | 19.65 ± 0.25 | 0.0700                  |
| 12-Dehydrosalsolinol       | HMDB12490                | 21.63 ± 0.12 | 20.21 ± 0.25 | 0.0696                  |
| Arachidyl carnitine        | HMDB06460                | 19.48 ± 0.26 | 17.63 ± 0.18 | 0.0445                  |
| Isobutyryl-L-carnitine     | HMDB00736                | 24.93 ± 0.47 | 22.64 ± 0.12 | 0.0700                  |
| Dimethyl fumarate          | HMDB31257                | 17.80 ± 0.24 | 20.27 ± 0.26 | 0.0226                  |
| Oxoadipic acid             | HMDB00225                | 15.40 ± 0.45 | 17.54 ± 0.31 | 0.0988                  |
| D-Glucose                  | HMDB00122                | 20.10 ± 0.25 | 22.21 ± 0.25 | 0.0329                  |
| Sorbitan palmitate         | HMDB29887                | 21.05 ± 0.21 | 22.83 ± 0.28 | 0.0526                  |
| MG(0:014:1(9Z)0:0)         | HMDB11531                | 19.90 ± 0.24 | 21.41 ± 0.25 | 0.0799                  |
| 3-Succinoylpyridine        | HMDB00992                | 20.02 ± 0.26 | 21.51 ± 0.16 | 0.0657                  |
| Palmitoleic acid           | HMDB03229                | 25.56 ± 0.20 | 26.99 ± 0.27 | 0.0979                  |
| Myristoleic acid           | HMDB02000                | 22.03 ± 0.23 | 20.86 ± 0.12 | 0.0988                  |
| (R)-3-Hydroxybutyric acid  | HMDB00011                | 22.60 ± 0.14 | 21.06 ± 0.27 | 0.0570                  |
| (R)-3-Hydroxydecanoic acid | HMDB10725                | 19.68 ± 0.19 | 17.98 ± 0.15 | 0.0329                  |
| 3-Hydroxyoctanoic acid     | HMDB01954                | 18.69 ± 0.28 | 16.79 ± 0.17 | 0.0352                  |

**Table S5: Metabolites That Are Unique to 3-MST KO Mice following TAC.**

12 weeks of TAC significantly changed 45 metabolites (30 up and 15 down) in the hearts of 3-MST KO mice.

| Metabolite                               | Identifier (HMDB) | Sham         | TAC          | Adjusted P value |
|------------------------------------------|-------------------|--------------|--------------|------------------|
| Lactosamine                              | HMDB06591         | 11.59 ± 0.20 | 16.50 ± 1.32 | 0.052            |
| Seriny-Glutamine                         | HMDB29037         | 19.41 ± 0.25 | 21.77 ± 0.62 | 0.064            |
| 4-Methylthiazole                         | HMDB33116         | 14.90 ± 0.20 | 16.77 ± 0.22 | 0.011            |
| 2-Keto-6-aminocaproate                   | HMDB12151         | 18.36 ± 0.18 | 19.96 ± 0.22 | 0.017            |
| Biotin amide                             | HMDB01458         | 18.02 ± 0.10 | 19.52 ± 0.19 | 0.009            |
| L-Methionine                             | HMDB00696         | 23.89 ± 0.20 | 25.20 ± 0.30 | 0.064            |
| 23-Dihydrothiophene                      | HMDB33875         | 20.84 ± 0.21 | 22.09 ± 0.27 | 0.064            |
| 8-Hydroxy-deoxyguanosine                 | HMDB03333         | 18.51 ± 0.14 | 19.38 ± 0.11 | 0.040            |
| Betaine                                  | HMDB00043         | 26.01 ± 0.10 | 26.77 ± 0.14 | 0.060            |
| Vaporole                                 | HMDB01382         | 26.01 ± 0.10 | 26.77 ± 0.14 | 0.060            |
| PE(22:5(7Z10Z13Z16Z19Z)18:1(9Z))         | HMDB09653         | 22.03 ± 0.06 | 22.79 ± 0.20 | 0.080            |
| m-Tyramine                               | HMDB04989         | 24.21 ± 0.09 | 23.36 ± 0.20 | 0.067            |
| Isovalerylcarnitine                      | HMDB00688         | 21.78 ± 0.14 | 20.72 ± 0.31 | 0.098            |
| Hydroxyhexanoylcarnitine                 | HMDB13131         | 22.74 ± 0.12 | 21.37 ± 0.31 | 0.044            |
| N-Ornithyl-L-taurine                     | HMDB33519         | 23.38 ± 0.08 | 21.48 ± 0.16 | 0.004            |
| Hexanoylcarnitine                        | HMDB00705         | 23.39 ± 0.06 | 21.29 ± 0.55 | 0.051            |
| L-Aspartic acid                          | HMDB00191         | 19.38 ± 0.44 | 22.31 ± 0.89 | 0.073            |
| Citric acid                              | HMDB00094         | 16.88 ± 0.28 | 19.13 ± 0.26 | 0.006            |
| Galactonic acid                          | HMDB00565         | 16.90 ± 0.15 | 18.73 ± 0.62 | 0.083            |
| Pyrocatechol sulfate                     | HMDB59724         | 16.69 ± 0.13 | 18.47 ± 0.25 | 0.005            |
| Glucaric acid                            | HMDB00663         | 14.16 ± 0.43 | 15.84 ± 0.41 | 0.087            |
| PC(o-20:020:0)                           | HMDB13441         | 15.06 ± 0.20 | 16.59 ± 0.21 | 0.010            |
| D-2-Hydroxyglutaric acid                 | HMDB00606         | 19.93 ± 0.11 | 21.36 ± 0.47 | 0.077            |
| Sorbitol                                 | HMDB00247         | 16.36 ± 0.27 | 17.77 ± 0.31 | 0.056            |
| Citramalic acid                          | HMDB00426         | 20.38 ± 0.13 | 21.58 ± 0.37 | 0.073            |
| D-2-Hydroxyglutaric acid                 | HMDB00606         | 19.93 ± 0.11 | 21.36 ± 0.47 | 0.077            |
| Citraconic acid                          | HMDB00634         | 24.00 ± 0.16 | 25.09 ± 0.17 | 0.024            |
| Ergothioneine                            | HMDB03045         | 17.09 ± 0.04 | 18.07 ± 0.15 | 0.011            |
| 3b4b7a12a-Tetrahydroxy-5b-cholanoic acid | HMDB00311         | 21.98 ± 0.15 | 22.92 ± 0.20 | 0.053            |
| LysoPC(15:0)                             | HMDB10381         | 21.64 ± 0.25 | 22.58 ± 0.21 | 0.091            |
| L-Valine                                 | HMDB00883         | 26.01 ± 0.10 | 26.77 ± 0.14 | 0.060            |
| cis-Aconitic acid                        | HMDB00072         | 18.98 ± 0.08 | 19.73 ± 0.22 | 0.087            |
| m-Cresol                                 | HMDB02048         | 16.56 ± 0.10 | 17.30 ± 0.19 | 0.074            |
| p-Cresol sulfate                         | HMDB11635         | 20.57 ± 0.10 | 21.26 ± 0.15 | 0.063            |
| L-Isoleucine                             | HMDB00172         | 21.95 ± 0.14 | 22.61 ± 0.11 | 0.071            |
| L-Leucine                                | HMDB00687         | 26.19 ± 0.10 | 27.40 ± 0.19 | 0.022            |
| Proline betaine                          | HMDB04827         | 14.86 ± 0.08 | 14.42 ± 0.04 | 0.090            |
| Malonic acid                             | HMDB00691         | 16.99 ± 0.22 | 16.21 ± 0.11 | 0.082            |
| 9-Oxohexadecanoic acid                   | HMDB30973         | 22.06 ± 0.17 | 20.92 ± 0.32 | 0.072            |
| 10-Oxoctadecanoic acid                   | HMDB30980         | 24.66 ± 0.18 | 23.43 ± 0.13 | 0.012            |

|                              |           |              |              |       |
|------------------------------|-----------|--------------|--------------|-------|
| (R)-3-Hydroxyisobutyric acid | HMDB00336 | 22.36 ± 0.09 | 21.03 ± 0.14 | 0.004 |
| MG(0:018:3(9Z12Z15Z)0:0)     | HMDB11540 | 19.21 ± 0.19 | 17.68 ± 0.45 | 0.066 |
| Gamma-Glutamylcysteine       | HMDB01049 | 18.05 ± 0.13 | 16.51 ± 0.55 | 0.095 |
| Succinic acid                | HMDB00254 | 24.43 ± 0.11 | 22.66 ± 0.40 | 0.022 |
| (R)-2-Hydroxycaprylic acid   | HMDB02264 | 18.62 ± 0.05 | 16.85 ± 0.40 | 0.020 |
| 2-Hydroxymyristic acid       | HMDB02261 | 20.62 ± 0.13 | 18.03 ± 0.79 | 0.058 |

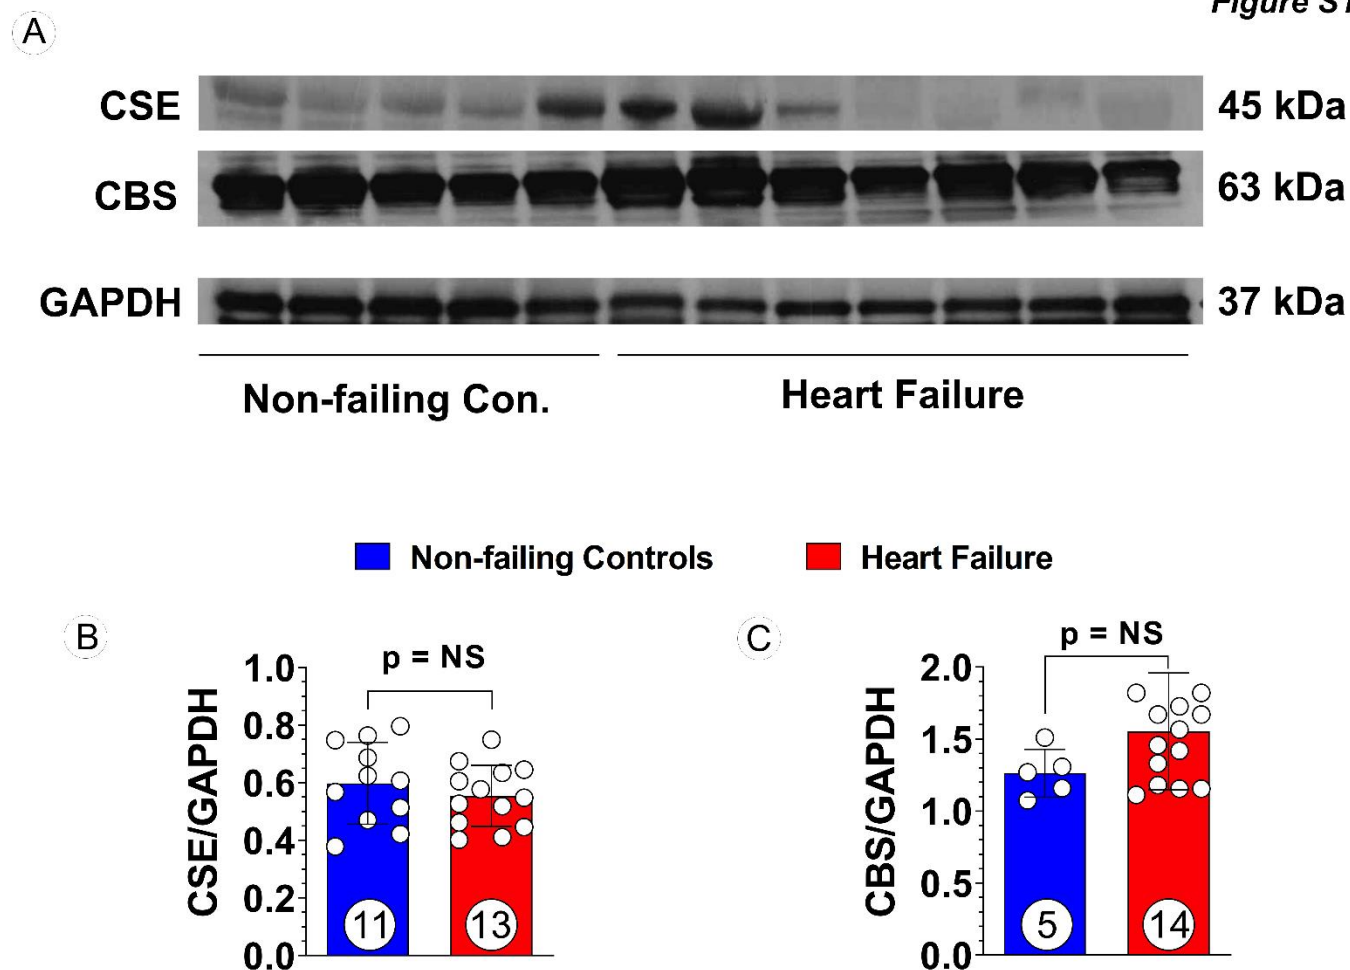

**Figure S1: Protein Expression of CSE and CBS in Human Non-failing Control Hearts and Failing Hearts.**

**(A)** Representative Western blots of human myocardial CSE and CBS. **(B)** and **(C)** Quantification of the Western blot images. Data were analyzed with student unpaired 2-tailed *t* test **(B)** or Mann-Whitney test **(C)** and presented as mean  $\pm$  SD.



**Figure S2**

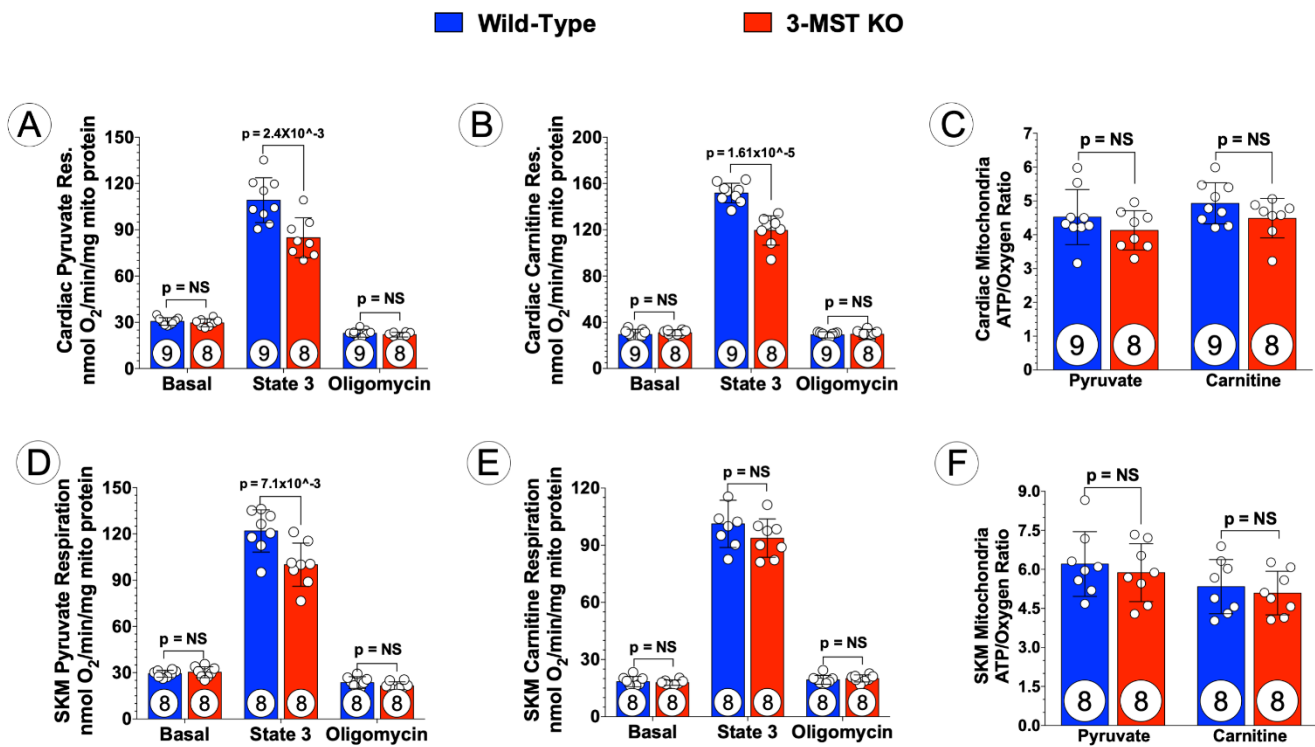

**Figure S2: Mitochondrial Respiration in Wildtype and 3-MST KO Mice under Baseline Condition.**

Respiration using (A) pyruvate or (B) carnitine as substrate and (C) ATP synthesis efficiency in mitochondria isolated from wildtype or 3-MST KO hearts at 10 weeks of age under baseline condition. Respiration using (D) pyruvate or (E) carnitine as substrate and (F) ATP synthesis efficiency in mitochondria isolated from wildtype or 3-MST KO skeletal muscle at 10 weeks of age under baseline condition. Circles inside bars indicates samples size. Data were analyzed with student unpaired 2-tailed *t* test and presented as mean  $\pm$  SD.

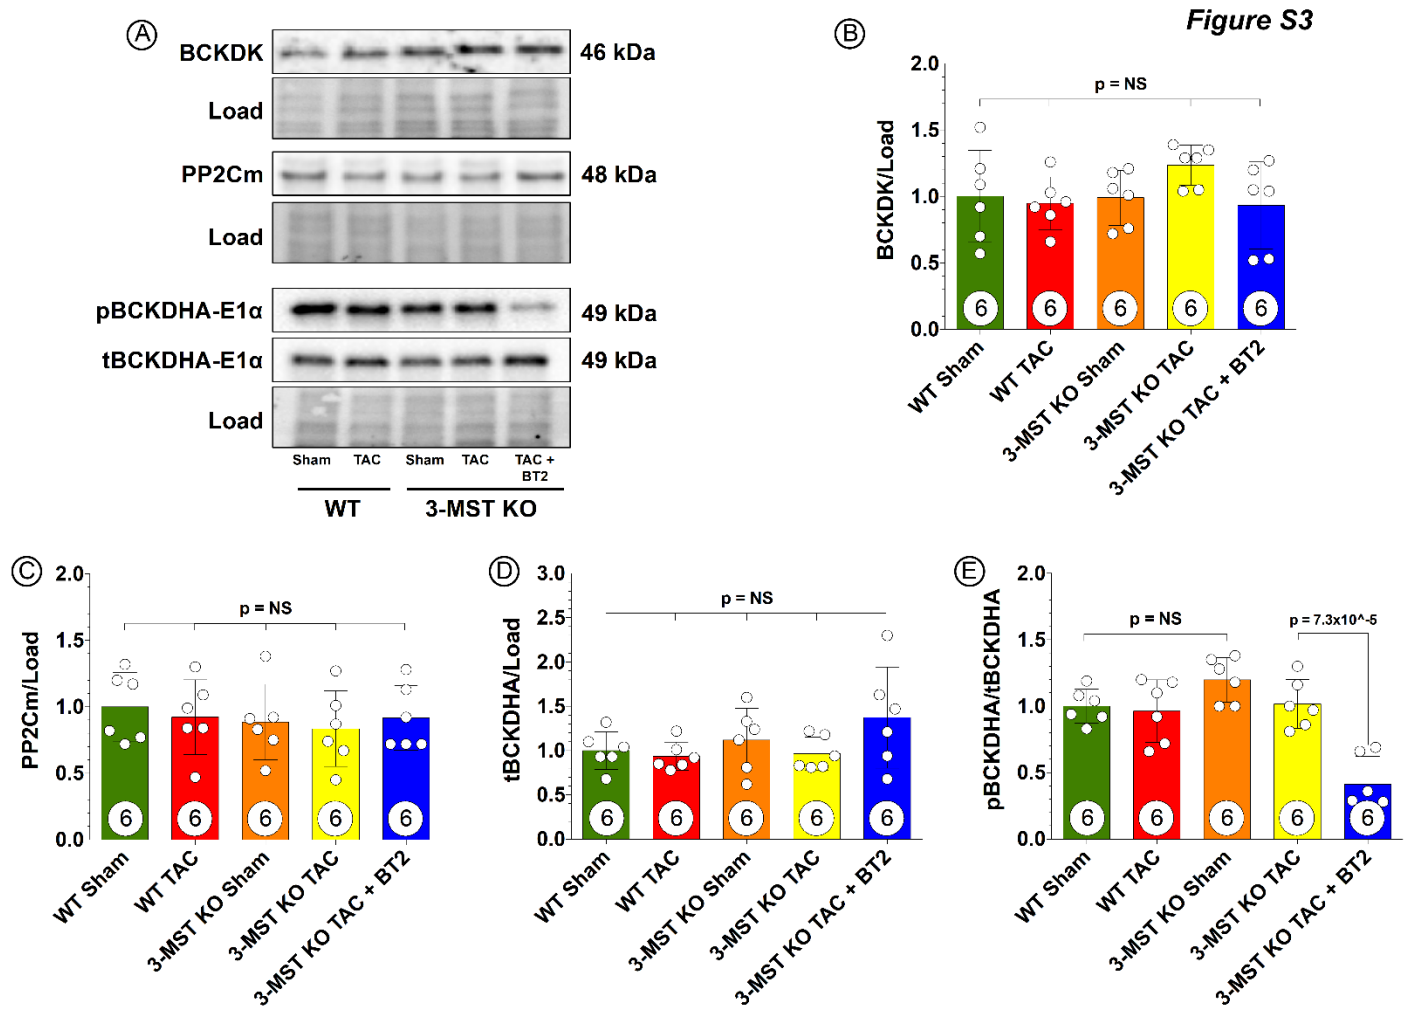

**Figure S3: Protein Expression of Key BCAA Catabolic Enzymes in Wildtype and 3-MST KO Mice.**

**(A)** Representative Western blots of BCKDK, PP2Cm, phosphorylated BCKD and total BCKD, quantified **(B)** BCKDK, **(C)** PP2Cm, **(D)** total BCKD, and **(E)** phosphorylated BCKD/total BCKD ratio. Circles inside bars indicates samples size. Data were analyzed with Kruskal-Wallis test and presented as mean  $\pm$  SD.

Figure S4

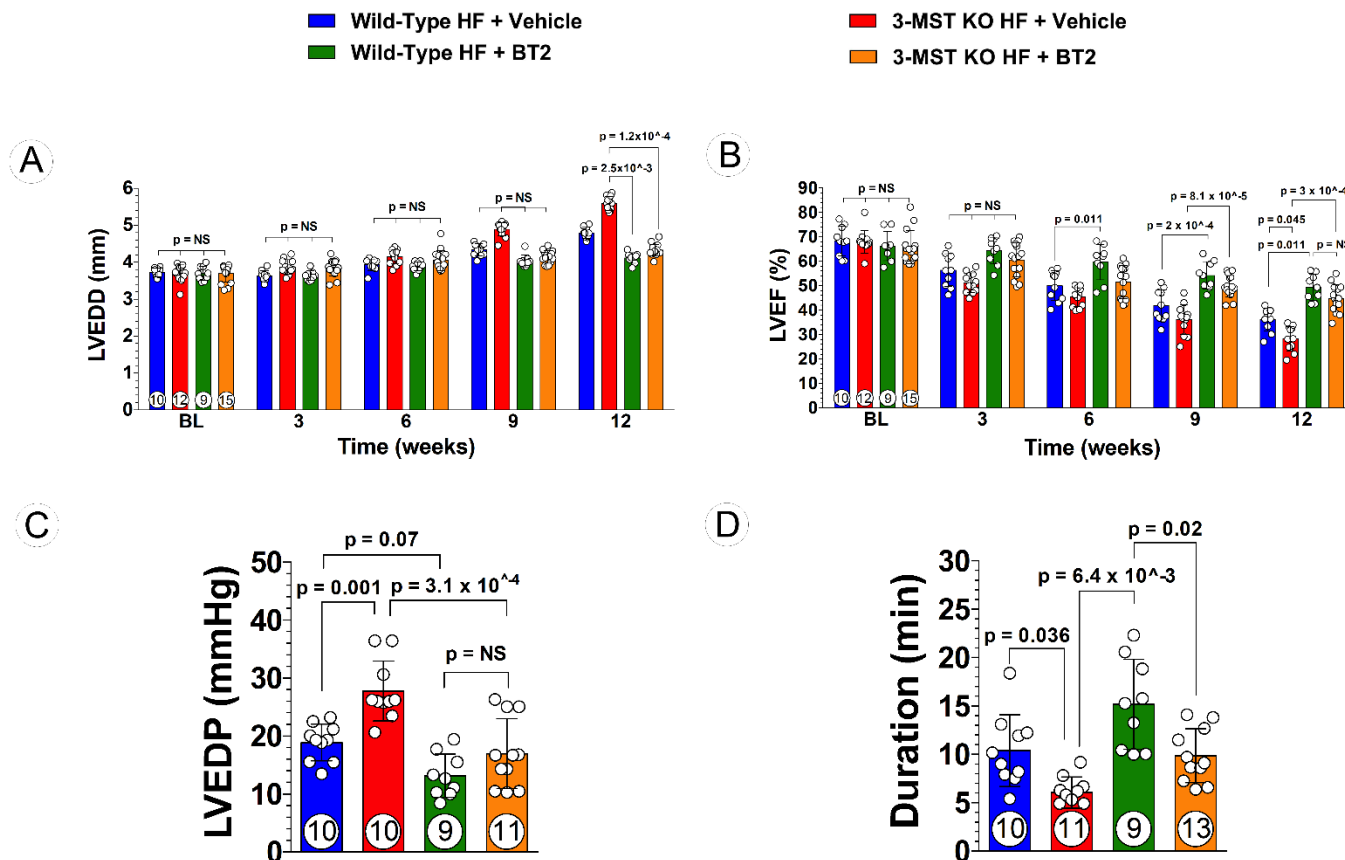

**Figure S4: Cardiac Structure, Function, LVEDP, and Exercise Capacity in Wildtype or 3-MST KO Mice Treated with Vehicle or BT2 following TAC.**

**(A)** LV end-diastolic diameter (LVEDD) and **(B)** LV ejection fraction (LVEF) throughout the 12 weeks study for 3-MST KO and wildtype (WT) control mice treated with either Vehicle or BT2. **(C)** LV end-diastolic pressure (LVEDP) and **(D)** treadmill running duration in 3-MST KO and WT control mice treated with either Vehicle or BT2 at 12 weeks post TAC. Circles inside bars indicates samples size. Data in **(A)** and **(B)** were analyzed with ordinary 2-way ANOVA; data in **(C)** and **(D)** were analyzed with ordinary 1-way ANOVA. All data are presented as mean  $\pm$  SD.

Figure S5

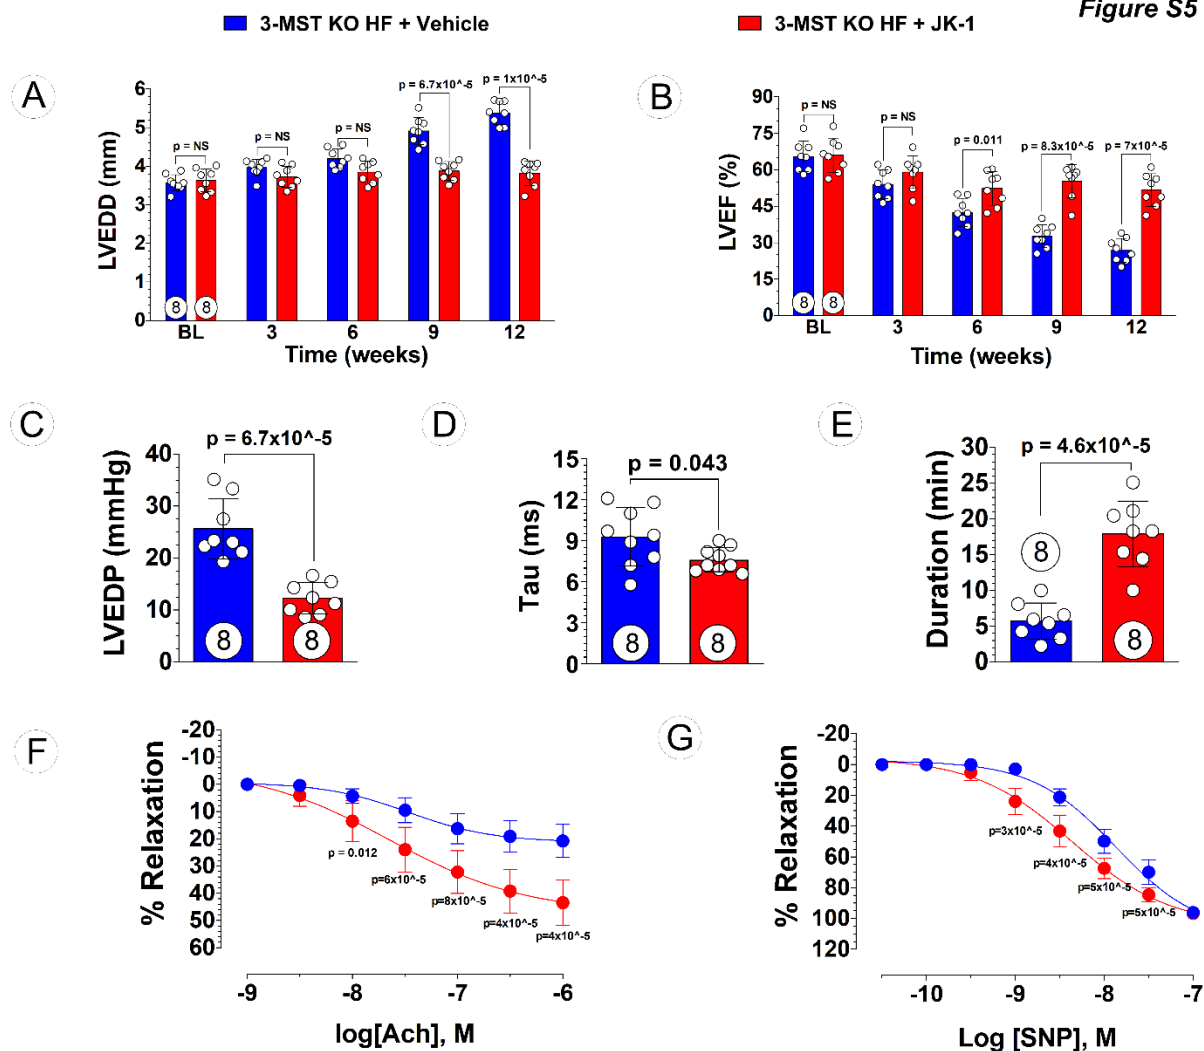

**Figure S5: Cardiac Structure, Function, LV hemodynamics, vascular reactivity, and Exercise Capacity in Wildtype or 3-MST KO Mice Treated with Vehicle or JK-1 following TAC.**

(A) LV end-diastolic diameter (LVEDD) and (B) LV ejection fraction (LVEF) throughout the 12 weeks study for 3-MST KO and wildtype (WT) control mice treated with either Vehicle or JK-1. (C) LV end-diastolic pressure (LVEDP), (D) relaxation constant Tau, (E) treadmill running duration, (F) aortic vascular reactivity to acetylcholine (Ach), and (G) aortic vascular reactivity to sodium nitroprusside (SNP) in 3-MST KO and WT control mice treated with either Vehicle or BT2 at 12 weeks post TAC. Circles inside bars indicates samples size. Data in (A), (B), (F), and (G) were analyzed with ordinary 2-way ANOVA; data in (C) to (E) were analyzed with student unpaired 2-tailed *t* test. All data are presented as mean  $\pm$  SD.
